# Supplementary material
Source: bioRxiv or medRxiv preprint supplement (https://www.biorxiv.org/highwire/filestream/37531/field_highwire_adjunct_files/0/127373-1.pdf)
Supplement: Supplementary file [file 127373-1.pdf]

1 Autonomous combinatorial colour barcoding  
2 for multiplexing single molecule RNA  
3 visualization

4 Yong-Sheng Cheng<sup>1\*</sup>, Yue Zhuo<sup>1</sup>, Katharina Hartmann<sup>1</sup>,  
Peng Zou<sup>1</sup>, Gözde Bekki<sup>1</sup>, Heike Alter<sup>1</sup> & Hai-Kun Liu<sup>1\*</sup>

5 <sup>1</sup>Division of Molecular Neurogenetics, German Cancer  
6 Research Center (DKFZ), DKFZ-ZMBH Alliance, Im  
7 Neuenheimer Feld 280, Heidelberg, 69120, Germany.

8 \*Correspondence: [yongsheng.cheng@dkfz.de](mailto:yongsheng.cheng@dkfz.de) and  
9 [l.haikun@dkfz.de](mailto:l.haikun@dkfz.de)

10 **Supplementary Figures**

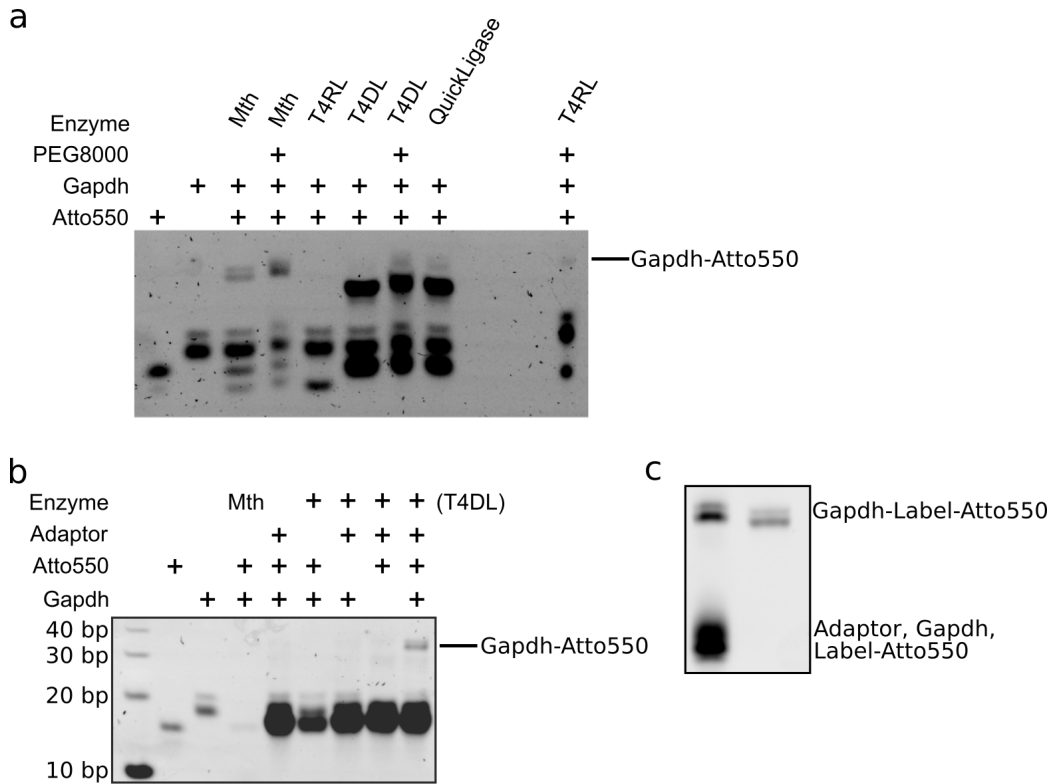

Figure 1: T4DL based HuluFISH 1.0 labelling and purification. (a) Various enzymes used for conjugating Gapdh oligo pool. Mth for Thermostable 5' AppDNA/RNA Ligase (NEB, M0319S). T4RL for T4 RNA ligase 1 (NEB, M0204S). QuickLigase (NEB, M2200S). The adaptor for T4DL was not 3' end amine blocked, therefore there is a thick band below Gapdh-Atto550 band. (b) Quality control reaction for HuluFISH labelling. Single oligo component or T4DL ligation reaction single component knockout condition. TrackIt™ 10 bp DNA Ladder (ThermoFisher, 10488019) was used as marker. Gel were stained with 3×GelRed in water. (c) Urea-PAGE gel purification of HuluFISH probe. The upper band is ligated HuluFISH probe, it runs slightly faster after purification (2<sup>nd</sup> lane).

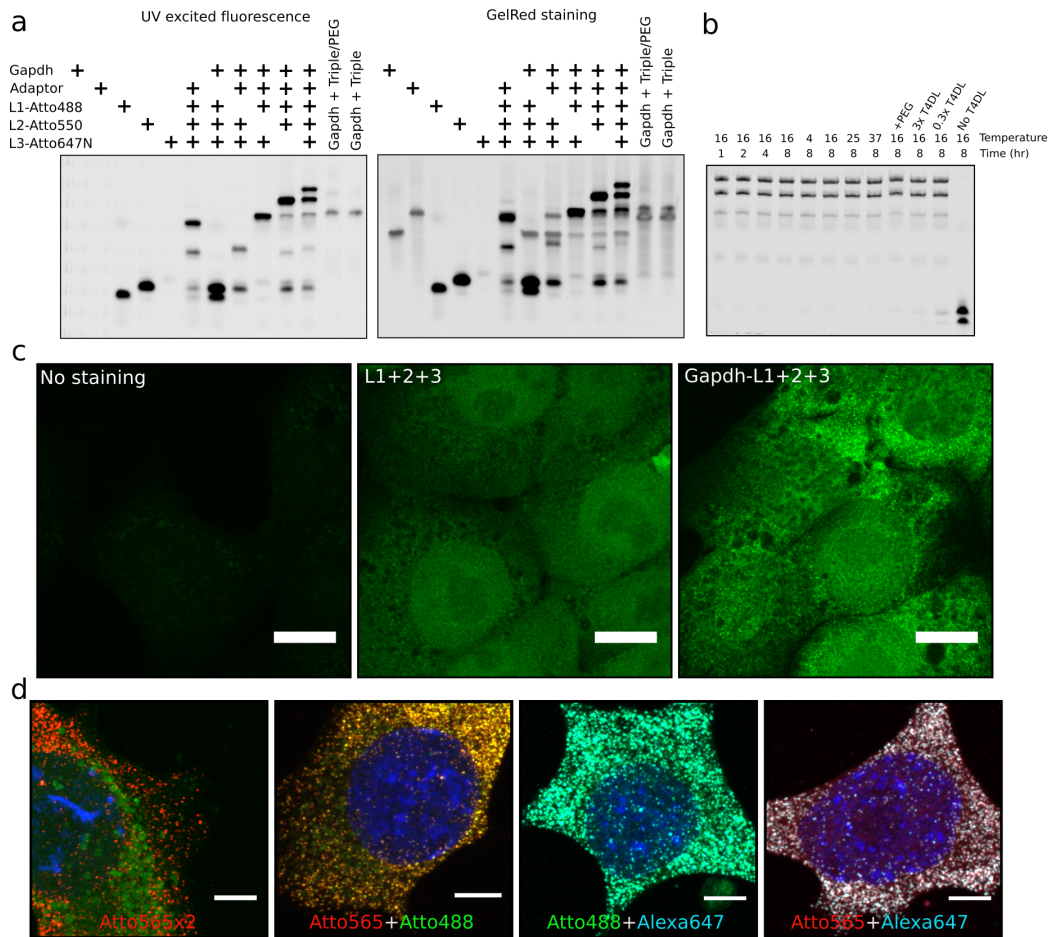

Figure 2: Multiple-way ligation for HuluFISH probe. (a) Quality control reaction for multiple piece ligation. Gapdh oligo pool, adaptor, and 3 singly labelled common label oligos were ligated together with various component knockout conditions. Gel was imaged with GelDoc (Bio-Rad) before and after GelRed staining. Only Atto488/550 can be properly excited in the unstained gel, Atto647N is weakly excited. (b) Condition scouting for multiple way ligation. Various times, temperatures and T4DL concentrations, or addition of PEG were tested for ligation efficiency. The top band is the triple labeled Gapdh probe. Scale bar 10  $\mu\text{m}$ . (c) Control staining for multiple-way ligation probes. Triple fluorophore probe alone (L1+2+3) and Gapdh-conjugated L1+2+3 were pre-annealed with adaptor and compared with non-stained control in Hepa 1-6 cells. (d) 4 different colour combinations for Gapdh individual staining. Scale bar 5  $\mu\text{m}$ .

## 11 Supplementary Tables

Table 1: Oligo sequences for HuluFISH

| Name                          | Sequences                                      | Notes                                |
|-------------------------------|------------------------------------------------|--------------------------------------|
| Label Atto550 (Hulu 1.0)      | CTAAATCCAT <sub>z</sub> A                      | z, Amino-C6-dT with Atto550          |
| Adaptor for Label Atto550     | ATGGATTTAGNNNN                                 |                                      |
| Adaptor for L1+2+3 (Hulu 2.0) | ACCGTGTCCCTGGGCGATAC-CGATTAGGGTGAGTT-TAGTCGAGC |                                      |
| L1                            | AAAC <sub>z</sub> CACCCTAATC                   | z, Amino-C6-dT with Atto/Alexa dyes  |
| L2                            | GGTA <sub>z</sub> CGCCC                        | z, Amino-C6-dT with Atto/Alexa dyes  |
| L3                            | AGGACACGGT                                     | 3' end modified with Atto/Alexa dyes |

Table 2: HuluFISH probe sequences

| Oligo_Name | Sequence             |
|------------|----------------------|
| Gapdh_old  | ATGAACCTAAGCTGGGA    |
| Gapdh_old  | AGGAAACACTCTCCTGA    |
| Gapdh_old  | TCACCATTTTGTCTACG    |
| Gapdh_old  | CCAAATCCGTTCACACC    |
| Gapdh_old  | TCTCCACTTTGCCACTG    |
| Gapdh_old  | AAGGGGTCGTTGATGGCAA  |
| Gapdh_old  | GACCATGTAGTTGAGGT    |
| Gapdh_old  | TGGAGTCATACTGGAAC    |
| Gapdh_old  | GTGCCGTTGAATTTGCC    |
| Gapdh_old  | CTTCCCATTCTCGGCCTTGA |
| Gapdh_old  | AAGATGGTGATGGGCTT    |
| Gapdh_old  | ATGTTAGTGGGGTCTCG    |
| Gapdh_old  | ACGACATACTCAGCACC    |

|           |                      |
|-----------|----------------------|
| Gapdh_old | CCATGGTGGTGAAGACA    |
| Gapdh_old | AGATGATGACCCTTTTG    |
| Gapdh_old | ACAAACATGGGGGCATC    |
| Gapdh_old | GACAATCTTGAGTGAGT    |
| Gapdh_old | AGTTGGTGGTGCAGGAT    |
| Gapdh_old | CCAAAGTTGTCATGGAT    |
| Gapdh_old | GGTCATGAGCCCTTCCACAA |
| Gapdh_old | TCTTCTGGGTGGCAGTGAT  |
| Gapdh_old | ATGATGTTCTGGGCAGC    |
| Gapdh_old | AGTGAGCTTCCCGTTCA    |
| Gapdh_old | TAGGAACACGGAAGGCCAT  |
| Gapdh_old | ACTTGGCAGGTTTCTCC    |
| Gapdh_old | ACCACCTTCTTGATGTC    |
| Gapdh_old | AAGATGCCCTTCAGTGG    |
| Gapdh_old | GTTGAAGTCGCAGGAGA    |
| Gapdh_old | AGGTGGAAGAGTGGGAGTT  |
| Gapdh_old | TTGAGAGCAATGCCAGC    |
| Gapdh_old | GGAAATGAGCTTGACAA    |
| Gapdh_old | AGCCGTATTCATTGTCA    |
| Nr2e1_old | AATGCGGCTTGTTGATC    |
| Nr2e1_old | TAGACCCCGTAGTGCTT    |
| Nr2e1_old | TTGAAGAATCCGGAGCA    |
| Nr2e1_old | GGTCCTATTCCTTCGAA    |
| Nr2e1_old | GGTTTCCAGACTTGACAG   |
| Nr2e1_old | TGTCTTGTCTACGGGGCAT  |
| Nr2e1_old | ACGCCCTGCATTGGTTT    |
| Nr2e1_old | TCCAAACACTTCTTCAG    |
| Nr2e1_old | GGCATCTTTGTTTCATGT   |
| Nr2e1_old | TGTTTGC GGATGGTGGA   |
| Nr2e1_old | TGTGAAGAAAGCAGGGG    |
| Nr2e1_old | TTCAGGAGTGGCAGACA    |
| Nr2e1_old | TTCATGGGGATACTTGG    |
| Nr2e1_old | AGATACATTGGGGTCCC    |
| Nr2e1_old | TTCACACACGGACTCAG    |
| Nr2e1_old | TAAAGAGAAGCCTGGCA    |
| Nr2e1_old | CTCTTTGCCCACTTGAT    |
| Nr2e1_old | CAAAGTGGA AAAAGGCTG  |
| Nr2e1_old | TGGCCCATTGTGCTATT    |

|           |                       |
|-----------|-----------------------|
| Nr2e1_old | AGAGTGTTAGCATCAAC     |
| Nr2e1_old | ATTCATGCCAGATACAG     |
| Nr2e1_old | TCTGGGAGTCTGTGTTG     |
| Nr2e1_old | GCAAAGCCTGTATTTCA     |
| Nr2e1_old | CTAATCGGAGCTGTCTG     |
| Nr2e1_old | AGACAGGCAAATTCAGT     |
| Nr2e1_old | GGAACAGCTTTGAAAGT     |
| Nr2e1_old | CTCAGTTCAGAACCACT     |
| Nr2e1_old | ATCTTGAGAGCGGCAA      |
| Nr2e1_old | TGTTGAGAGTTAGCTGA     |
| Nr2e1_old | GGGTATCTGGTATGAAT     |
| Nr2e1_old | CTAATTGACCGTAAAGC     |
| Nr2e1_old | GTCACTGGATTTGTACA     |
| Gapdh_new | AACCTAAGCTGGGACCCC    |
| Gapdh_new | GGACGAGGAAACACTCTCCTG |
| Gapdh_new | CGACCTTCACCATTTTGTCT  |
| Gapdh_new | TGACCAGGCGCCCAATAC    |
| Gapdh_new | CAATCTCCACTTTGCCACTG  |
| Gapdh_new | ATGAAGGGGTCGTTGATGGCA |
| Gapdh_new | CCGTGAGTGGAGTCATACTGG |
| Gapdh_new | CCTTGACTGTGCCGTTGAATT |
| Gapdh_new | ATGACAAGCTTCCCATTCTCG |
| Gapdh_new | CTGGAAGATGGTGATGGGCTT |
| Gapdh_new | TGATGTTAGTGGGGTCTCGCT |
| Gapdh_new | CACGACATACTCAGCACCGG  |
| Gapdh_new | GGCTCCACCCTTCAAGTG    |
| Gapdh_new | GGGCGGAGATGATGACCCTTT |
| Gapdh_new | TCACAAACATGGGGGCATCGG |
| Gapdh_new | GGCTAAGCAGTTGGTGGTGC  |
| Gapdh_new | CCTTCCACAATGCCAAAGTTG |
| Gapdh_new | GTGATGGCATGGACTGTGGT  |
| Gapdh_new | GGCCATCCACAGTCTTCT    |
| Gapdh_new | TCACGCCACAGCTTTCCAGAG |
| Gapdh_new | GATGATGTTCTGGGCAGCC   |
| Gapdh_new | GGATGACCTTGCCCACAG    |
| Gapdh_new | GTGAGCTTCCCGTTCAGC    |
| Gapdh_new | AGGAACACGGAAGGCCATGC  |
| Gapdh_new | CATACTTGGCAGGTTTCTCC  |

|           |                        |
|-----------|------------------------|
| Gapdh_new | CTTCACCACCTTCTTGATGTC  |
| Gapdh_new | TCAGTGGGCCCTCAGATGCCT  |
| Gapdh_new | TCAGTGTAGCCCAAGATGCC   |
| Gapdh_new | TGCTGTTGAAGTCGCAGGAGA  |
| Gapdh_new | TTGAGAGCAATGCCAGCCCCG  |
| Gapdh_new | GCTGTAGCCGTATTCATTGTC  |
| Gapdh_new | AGTGTCCCTTGCTGGGGTGGGT |
| Tlx_new   | TTGGTTGTGCGCTGCCCTGCT  |
| Tlx_new   | TGATCCGGCGGGCTTGCTCAT  |
| Tlx_new   | CCACACACTTTGCAAGGGATA  |
| Tlx_new   | TAGTGCTTCCCGGAGCTG     |
| Tlx_new   | TTGAAGAATCCGGAGCAGCC   |
| Tlx_new   | TCCAGACTTGCAGACATAGGT  |
| Tlx_new   | TTGTCTACGGGGCATCCTCC   |
| Tlx_new   | CCTGCATTGGTTTCTGTGTGT  |
| Tlx_new   | GCACGGCATCTTTGTTTCATGT |
| Tlx_new   | GTTTGCGGATGGTGGACGTC   |
| Tlx_new   | GTCTTCCTTGTGTCCACGG    |
| Tlx_new   | CCGCTGTGAAGAAAGCAGGGG  |
| Tlx_new   | ACACAGCGGCCAACTCCAGAC  |
| Tlx_new   | ATGGGGATACTTGGGCGTGGG  |
| Tlx_new   | GTAGAGATACATTGGGGTCCC  |
| Tlx_new   | TCACACACGGACTCAGTGGC   |
| Tlx_new   | TGCCCACTTGATGCTCATAA   |
| Tlx_new   | TGGAAAAGGCTGGCACACTCT  |
| Tlx_new   | CGCGTCTTCCAAAAGCATCAG  |
| Tlx_new   | CCCATTGTGCTATTCCTAGA   |
| Tlx_new   | AGAGTGTTAGCATCAACCGGA  |
| Tlx_new   | ATTCATGCCAGATACAGCCAG  |
| Tlx_new   | TCTGGGAGTCTGTGTTGTCAG  |
| Tlx_new   | CCTCTTGCAAAGCCTGTATT   |
| Tlx_new   | AGCTGTCTGAACCGAGCCACC  |
| Tlx_new   | CCACTGTGTGTAGGAACAGCT  |
| Tlx_new   | GCATTCCGGAAACTTCTCAGT  |
| Tlx_new   | CATCTTGGAGAGCGGCAATGG  |
| Tlx_new   | CTGTTGAGAGTTAGCTGAGCC  |
| Tlx_new   | GGGTGGGGTATCTGGTATGAA  |
| Tlx_new   | TCTAATACTGCCCCATCTTG   |

|           |                                  |
|-----------|----------------------------------|
| Tlx_new   | TTGACCTGCATGTAGATGTCC            |
| Gapdh_tag | AACCTAAGCTGGGACCCcagctcgact      |
| Gapdh_tag | GGACGAGGAAACACTCTCCTGacgctcgact  |
| Gapdh_tag | CGACCTTCACCATTTTGTCTacgctcgact   |
| Gapdh_tag | TGACCAGGCGCCCAATACacgctcgact     |
| Gapdh_tag | CAATCTCCACTTTGCCACTGacgctcgact   |
| Gapdh_tag | ATGAAGGGGTTCGTTGATGGCAacgctcgact |
| Gapdh_tag | CCGTGAGTGGAGTCATACTGGacgctcgact  |
| Gapdh_tag | CCTTGACTGTGCCGTTGAATTacgctcgact  |
| Gapdh_tag | ATGACAAGCTTCCCATTCTCGacgctcgact  |
| Gapdh_tag | CTGGAAGATGGTGATGGGCTTacgctcgact  |
| Gapdh_tag | TGATGTTAGTGGGGTCTCGCTacgctcgact  |
| Gapdh_tag | CACGACATACTCAGCACCGGacgctcgact   |
| Gapdh_tag | GGCTCCACCCTTCAAGTGacgctcgact     |
| Gapdh_tag | GGGCGGAGATGATGACCCTTTacgctcgact  |
| Gapdh_tag | TCACAAACATGGGGGCATCGGacgctcgact  |
| Gapdh_tag | GGCTAAGCAGTTGGTGGTGCacgctcgact   |
| Gapdh_tag | CCTTCCACAATGCCAAAGTTGacgctcgact  |
| Gapdh_tag | GTGATGGCATGGACTGTGGTacgctcgact   |
| Gapdh_tag | GGCCATCCACAGTCTTCTacgctcgact     |
| Gapdh_tag | TCACGCCACAGCTTTCCAGAGacgctcgact  |
| Gapdh_tag | GATGATGTTCTGGGCAGCCacgctcgact    |
| Gapdh_tag | GGATGACCTTGCCCACAGacgctcgact     |
| Gapdh_tag | GTGAGCTTCCCGTTCAGCacgctcgact     |
| Gapdh_tag | AGGAACACGGAAGGCCATGCacgctcgact   |
| Gapdh_tag | CATACTTGGCAGGTTTCTCCacgctcgact   |
| Gapdh_tag | CTTACCACCTTCTTGATGTCacgctcgact   |
| Gapdh_tag | TCAGTGGGCCCTCAGATGCCCTacgctcgact |
| Gapdh_tag | TCAGTGTAGCCCAAGATGCCacgctcgact   |
| Gapdh_tag | TGCTGTTGAAGTCGCAGGAGAacgctcgact  |
| Gapdh_tag | TTGAGAGCAATGCCAGCCCCGacgctcgact  |
| Gapdh_tag | GCTGTAGCCGTATTCATTGTCacgctcgact  |
| Gapdh_tag | AGTGTCCCTTGCTGGGGTGGGTacgctcgact |
| Nr2e1_tag | TTGGTTGTGCGCTGCCCTGCTacgctcgact  |
| Nr2e1_tag | TGATCCGGCGGGCTTGCTCATacgctcgact  |
| Nr2e1_tag | CCACACACTTTGCAAGGGATAacgctcgact  |
| Nr2e1_tag | TAGTGCTTCCCGGAGCTGacgctcgact     |
| Nr2e1_tag | TTGAAGAATCCGGAGCAGCCacgctcgact   |



Nr2e1\_tag TCCAGACTTGCAGACATAGGTacgctcgact  
 Nr2e1\_tag TTGTCTACGGGGCATCCTCCacgctcgact  
 Nr2e1\_tag CCTGCATTGGTTTCTGTGTGTacgctcgact  
 Nr2e1\_tag GCACGGCATCTTTGTTTCATGTacgctcgact  
 Nr2e1\_tag GTTTGCGGATGGTGGACGTCacgctcgact  
 Nr2e1\_tag GTCTTCCTTGTGTCCACGGacgctcgact  
 Nr2e1\_tag CCGCTGTGAAGAAAGCAGGGGacgctcgact  
 Nr2e1\_tag ACACAGCGGCCAACTCCAGACacgctcgact  
 Nr2e1\_tag ATGGGGATACTTGGGCGTGGGacgctcgact  
 Nr2e1\_tag GTAGAGATACATTGGGGTCCCacgctcgact  
 Nr2e1\_tag TCACACACGGACTCAGTGGCacgctcgact  
 Nr2e1\_tag TGCCCACTTGATGCTCATAAacgctcgact  
 Nr2e1\_tag TGGAAAAGGCTGGCACACTCTacgctcgact  
 Nr2e1\_tag CGCGTCTTCCAAAAGCATCAGacgctcgact  
 Nr2e1\_tag CCCATTGTGCTATTCTAGAACacgctcgact  
 Nr2e1\_tag AGAGTGTAGCATCAACCGGAacgctcgact  
 Nr2e1\_tag ATTCATGCCAGATACAGCCAGacgctcgact  
 Nr2e1\_tag TCTGGGAGTCTGTGTTGTCAGacgctcgact  
 Nr2e1\_tag CCTCTTGCAAAGCCTGTATTacgctcgact  
 Nr2e1\_tag AGCTGTCTGAACCGAGCCACCacgctcgact  
 Nr2e1\_tag CCACTGTGTGTAGGAACAGCTacgctcgact  
 Nr2e1\_tag GCATTCCGAAACTTCTCAGTacgctcgact  
 Nr2e1\_tag CATCTTGAGAGCGGCAATGGacgctcgact  
 Nr2e1\_tag CTGTTGAGAGTTAGCTGAGCCacgctcgact  
 Nr2e1\_tag GGGTGGGGTATCTGGTATGAAacgctcgact  
 Nr2e1\_tag TCTAATACTGCCCCATCTTGacgctcgact  
 Nr2e1\_tag TTGACCTGCATGTAGATGTCCacgctcgact  
 Chd7\_tag ATCATCCCTGGGTCCGCCATacgctcgact  
 Chd7\_tag CCCATCCTCGCCAAAAGACTacgctcgact  
 Chd7\_tag ACATTCCCCGAGGCCTTCacgctcgact  
 Chd7\_tag TCACGGGGTTTTTCGGGGTAGCacgctcgact  
 Chd7\_tag CCTTGGTCTATGGGCATCTGacgctcgact  
 Chd7\_tag GGGATGGCTGTAAGGAGGGAAacgctcgact  
 Chd7\_tag TCATTCCGGTTAGGCTGATCCacgctcgact  
 Chd7\_tag GTGATACTGTGAGTGCGGAGAacgctcgact  
 Chd7\_tag ACTCCCATCTGACCGCCACCAacgctcgact  
 Chd7\_tag TTCGTTCTGGATGCCGGGATAacgctcgact  
 Chd7\_tag GCCGCCATCCACAAAAGATTacgctcgact

Chd7\_tag GCTCGTATCTGGTCTGGTACacgctcgact  
Chd7\_tag GCCCATCTGCTGCATGTGacgctcgact  
Chd7\_tag AATCCCCACGTGCCAGATAGCacgctcgact  
Chd7\_tag ACTGGCCCATCCTCTGCTGTGacgctcgact  
Chd7\_tag CCTGACTGAGGCCCTCTTAcgctcgact  
Chd7\_tag GAGGTGGCAATGAAAGGGCTTAcgctcgact  
Chd7\_tag GTGATGGTGGAACTGCTGCTGacgctcgact  
Chd7\_tag GAATCTGGGACTGTGGGCAACacgctcgact  
Chd7\_tag CTTGTTGAGGAGGGTTGGGGGacgctcgact  
Chd7\_tag AGGGTTTGTGGCCTGACAGCacgctcgact  
Chd7\_tag GGACTGTCTGGTTCGAGAAacgctcgact  
Chd7\_tag CCCTGAGTTGTTTACAGTAGGacgctcgact  
Chd7\_tag GGAGTACTGTTTGTAAAGGCCTAcgctcgact  
Chd7\_tag GGTATCTTGGTACCGACTGATAcgctcgact  
Chd7\_tag CCACTGTTTACGGGAATCCacgctcgact  
Chd7\_tag GAGTGGATAGGCTGCTGGTGacgctcgact  
Chd7\_tag GTTCATTTGGTTCAGTGAGCCacgctcgact  
Chd7\_tag GCTGTGAAGGGTGCATAGTTTAcgctcgact  
Chd7\_tag GGAGAGGCGTACGTTCCCTGAacgctcgact  
Chd7\_tag GCTGGGTTACTCATTGCTTTAcgctcgact  
Chd7\_tag CCAACTTCCATGGGCATCCacgctcgact  
Ascl1\_tag GCGCCTTCTCGGTTTTAAAAGacgctcgact  
Ascl1\_tag ATCGTCTTCCCTCTGCGCacgctcgact  
Ascl1\_tag GCAGAGTTGTCAGGCTGCAGCacgctcgact  
Ascl1\_tag GGGGAAGAAACGCGCAGAAGGacgctcgact  
Ascl1\_tag AGGAGAGGGGAGAAACGAGCCacgctcgact  
Ascl1\_tag GCACGATCAAAGGGGGACGAAacgctcgact  
Ascl1\_tag AACGAGTTGGGGACGCAGGGTAcgctcgact  
Ascl1\_tag CACTCTCCATCTTGCCAGAGacgctcgact  
Ascl1\_tag CGGTCGCAAAGAAGCAGGCTGacgctcgact  
Ascl1\_tag TGACTTGTGACCGCCCCCTGAacgctcgact  
Ascl1\_tag TGGCGCTTGACCTGCTTGacgctcgact  
Ascl1\_tag AGCGCATCAGTTCCGGAGAGacgctcgact  
Ascl1\_tag CTGAAGTTGAGCCGGCGTTTGacgctcgact  
Ascl1\_tag AACTTGACCCGTTGCGCTCGacgctcgact  
Ascl1\_tag TCTTCTTGTTGGCCGCGCacgctcgact  
Ascl1\_tag TAGTTGGGGGAGATGGTGGGCacgctcgact  
Ascl1\_tag CGCCATAGAGTTCAAGTCGTTAcgctcgact

|           |                                   |
|-----------|-----------------------------------|
| Ascl1_tag | TCGGAGGAGTAGGACGAGACCacgctcgact   |
| Ascl1_tag | GGCTAAGAGGGTCGTAGGATCacgctcgact   |
| Ascl1_tag | TCCAGCAGCTCTTGTTCCCTCacgctcgact   |
| Ascl1_tag | TCCATTCCCAGGAGAGCCacgctcgact      |
| Ascl1_tag | GGATCTGCTGCCATCCTGacgctcgact      |
| Ascl1_tag | CCCATTTGACGTCGTTGGCacgctcgact     |
| Ascl1_tag | TTTCCCCTTGTTTTTCTGCCacgctcgact    |
| Ascl1_tag | GGCTGTCTGGTTTTGTTTGTacgctcgact    |
| Ascl1_tag | ATCTTAGTGAAAGGTGCCCCacgctcgact    |
| Ascl1_tag | CCCTGTTTGCTGAGAACATTGacgctcgact   |
| Ascl1_tag | TCACTCTTCTCGTGTCTGGAAacgctcgact   |
| Ascl1_tag | TCGGGCTTAGGTTCCAGACACacgctcgact   |
| Ascl1_tag | CCAGGAAAGGAACCCATCTGTacgctcgact   |
| Ascl1_tag | GTGTGTGTGTGACGCTCTTGacgctcgact    |
| Ascl1_tag | CCTGTTAGTGGTTGGGAGTTAacgctcgact   |
| Pax6_tag  | CCGCTGTGACTGTTCTGCATacgctcgact    |
| Pax6_tag  | GACACCACCAAGCTGATTCACacgctcgact   |
| Pax6_tag  | TACGATCTTCTGCCGGGTGacgctcgact     |
| Pax6_tag  | TTCGGGAAATGTCGCACGGCCacgctcgact   |
| Pax6_tag  | CAACCGTTGGATACCTGCAGAACacgctcgact |
| Pax6_tag  | CCTGCCCAGAATTTTACTCACacgctcgact   |
| Pax6_tag  | GGTCTGATGGAGCCAGTCTacgctcgact     |
| Pax6_tag  | CTTACTCCCTCCGATTGCCCTacgctcgact   |
| Pax6_tag  | CCCGTTTATACTGGGCTATTacgctcgact    |
| Pax6_tag  | CCCAAGCAAAGATGGAAGGGCacgctcgact   |
| Pax6_tag  | ACCCCTCGGATAATAATCTacgctcgact     |
| Pax6_tag  | CCAGGTTGCGAAGAACTCTGTacgctcgact   |
| Pax6_tag  | GCCCATCTGTTGCTTTTTCacgctcgact     |
| Pax6_tag  | CCCGTTCAACATCCTTAGTTacgctcgact    |
| Pax6_tag  | GTA CTGAAGTCCCGGGATACacgctcgact   |
| Pax6_tag  | AGCCATCTTGCGTGGGTTGCCacgctcgact   |
| Pax6_tag  | TCCCCCTCCTTCCTGTTGCTGacgctcgact   |
| Pax6_tag  | GAGCTTCATCCGAGTCTTCTacgctcgact    |
| Pax6_tag  | TATTTCTTTGCAGCTTCCGCacgctcgact    |
| Pax6_tag  | CCTCAATCTGCTCTTGGGTAAacgctcgact   |
| Pax6_tag  | CCTCTCAAAC TCTTTCTCCAGacgctcgact  |
| Pax6_tag  | CCGGGCAAACACATCTGGATAacgctcgact   |
| Pax6_tag  | CCTGTATTCTTGCTTCAGGTacgctcgact    |

|          |                                  |
|----------|----------------------------------|
| Pax6_tag | CATTTGGCCCTTCGATTAGAacgctcgact   |
| Pax6_tag | GGTTCCTCAGTTTCTCTTCTCacgctcgact  |
| Pax6_tag | GTGTTGCTGGCCTGTCTTCTCacgctcgact  |
| Pax6_tag | GCTGCTGCTGATAGGAATGTGacgctcgact  |
| Pax6_tag | GCTGGTAGACACTGGTACTGAacgctcgact  |
| Pax6_tag | GGTGTGGTGGGCTGTGGGATTacgctcgact  |
| Pax6_tag | GTCTGTTCCGCCCCAACATGacgctcgact   |
| Pax6_tag | TGTACGTGTTGGTGAGGGCGGacgctcgact  |
| Pax6_tag | TGGTGAAGCTGGGCATGGGTGacgctcgact  |
| Pcna_tag | ACCCACCTCTCCTCAAGGacgctcgact     |
| Pcna_tag | GCAACCGTCTAATGCCGCacgctcgact     |
| Pcna_tag | CAACTACCAACCCTCTGCGCCacgctcgact  |
| Pcna_tag | CAAGGTCCCCCGATTACacgctcgact      |
| Pcna_tag | AAGAGGAACGAGGTCTGGCTGCacgctcgact |
| Pcna_tag | GGCGACTAGATGAGAGCTACTacgctcgact  |
| Pcna_tag | AGGATGGAGCCCTGGATCAGacgctcgact   |
| Pcna_tag | CCAGCAGGCCTCATTGATGAacgctcgact   |
| Pcna_tag | AGACGAGTCCATGCTCTGCacgctcgact    |
| Pcna_tag | GTAAGCTGTACCAAGGAGACGTacgctcgact |
| Pcna_tag | CGGTATGTGTGCGAAGCCTTCacgctcgact  |
| Pcna_tag | CCATGGCTAGGTTGCCGGTacgctcgact    |
| Pcna_tag | GGACATGCTGGTGAGGTTCAacgctcgact   |
| Pcna_tag | CTGCATTATCTTCAGCCCTTacgctcgact   |
| Pcna_tag | GGTGCTTCGAATACTAGTGCTAacgctcgact |
| Pcna_tag | GCTCCACATCTAAGTCCATTacgctcgact   |
| Pcna_tag | ACTCCTGTTCTGGGATTCCacgctcgact    |
| Pcna_tag | CGGCATCTTTATTACACAGCTGacgctcgact |
| Pcna_tag | CATATACGTGCAAATTCACCCGacgctcgact |
| Pcna_tag | GGATATCACAACAGCATCTCCAacgctcgact |
| Pcna_tag | ACTTCACCCCATCTTTGCACAacgctcgact  |
| Pcna_tag | CCAAGCTCTCCACTTGCAGAAAacgctcgact |
| Pcna_tag | GCCTCCTCTTCTTTATCCACATacgctcgact |
| Pcna_tag | CAGGCTCATTCATCTCTATGGTacgctcgact |
| Pcna_tag | CCTCAGAGCAAACGTTAGGTGAacgctcgact |
| Pcna_tag | ACAGTGGAGTGGCTTTTGTGAAacgctcgact |
| Pcna_tag | TCTACAACAAGGGGCACATCTGacgctcgact |
| Pcna_tag | GTGTCCCATGTCAGCAATTTacgctcgact   |
| Pcna_tag | CATCTTCAATCTTGGGAGCCAacgctcgact  |

|          |                                  |
|----------|----------------------------------|
| Pcna_tag | GCATCTCAGGAGCAATCTTCAAacgctcgact |
| Pcna_tag | GAAAAGACCTCAGGACACGCTGacgctcgact |
| Pcna_tag | GGCACTGCTCTATGACTTTTCAacgctcgact |
| Sox2_tag | CTCCGTCTCCATCATGTTATacgctcgact   |
| Sox2_tag | TTCTTCTGGTTGCCGCCGGTCacgctcgact  |
| Sox2_tag | TCATGGGCCTCTTGACGCGGTacgctcgact  |
| Sox2_tag | CCCGGGACCATAACCATGAAGacgctcgact  |
| Sox2_tag | TCCTGGGCCATCTTACGCacgctcgact     |
| Sox2_tag | CGAGTTGTGCATCTTGGGGTTacgctcgact  |
| Sox2_tag | AAGTTTCCACTCCGCGCCAGacgctcgact   |
| Sox2_tag | GCTTGGCCTCGTCGATGAACacgctcgact   |
| Sox2_tag | CTCCTTCATGTGCAGAGCGacgctcgact    |
| Sox2_tag | CGGCCGGTATTTATAATCCGacgctcgact   |
| Sox2_tag | CTTCTTCATGAGCGTCTTGGTacgctcgact  |
| Sox2_tag | CTCCGGGAAGCGTGTACTTATacgctcgact  |
| Sox2_tag | AACCCCGCTCGCCATGCTGTTacgctcgact  |
| Sox2_tag | GTAGCTGTCCATGCGCTGacgctcgact     |
| Sox2_tag | TGACGTCGTAGCGGTGCATCGacgctcgact  |
| Sox2_tag | GCTGGTCATGGAGTTGTACTGacgctcgact  |
| Sox2_tag | AGCCGTTTCATGTAGGTCTGCCacgctcgact |
| Sox2_tag | TAGGACATGCTGTAGGTGGGCacgctcgact  |
| Sox2_tag | TGACCACAGAGCCCATGGAGCacgctcgact  |
| Sox2_tag | CTGGAGTGGGAGGAAGAGGTAacgctcgact  |
| Sox2_tag | TGCTGATCATGTCCCGGAGacgctcgact    |
| Sox2_tag | TGGTAGTGCTGGGCCATGTGacgctcgact   |
| Sox2_tag | TCACATGTGCGACAGGGGCAacgctcgact   |
| Sox2_tag | TCTCCAGTTCGCAGTCCAGCCacgctcgact  |
| Sox2_tag | CCCAATTCCCTTGTATCTCTacgctcgact   |
| Sox2_tag | ACTCTCCTCTTTTTGCACCCCacgctcgact  |
| Sox2_tag | CGTTTCGCTGCGGAGATTTTTacgctcgact  |
| Sox2_tag | GGCATCACGGTTTTTTGCGTTAacgctcgact |
| Sox2_tag | CCCCAAAAGAAGTCCAAGAacgctcgact    |
| Sox2_tag | CCCTCAGGTTTTTCTCTGTACAacgctcgact |
| Sox2_tag | TACATGGTCCGATTCCCCCGacgctcgact   |
| Sox2_tag | GCCTAACGTACCACTAGAACTacgctcgact  |
| Hes5_tag | GGAGCTCTGGAGGCGATTAGacgctcgact   |
| Hes5_tag | CACGGTACTTGGGGCCATacgctcgact     |
| Hes5_tag | TGGGACTGAGCATCTCCACCGacgctcgact  |

|          |                                  |
|----------|----------------------------------|
| Hes5_tag | TCTTCTCCACCACCGGCTTCCacgctcgact  |
| Hes5_tag | TGCTGTTGATGCGGTCCCacgctcgact     |
| Hes5_tag | AGCTTGGAGTTGGGCTGGTGCacgctcgact  |
| Hes5_tag | CTCCAGGATGTCGGCCTTCTCacgctcgact  |
| Hes5_tag | TGTGTTTCAGGTAGCTGACGGacgctcgact  |
| Hes5_tag | TCGCTGTAGTCCTGGTGCAGacgctcgact   |
| Hes5_tag | AACTGTACCGCCTCCTGCacgctcgact     |
| Hes5_tag | CAGCTTCATCTGCGTGTCCacgctcgact    |
| Hes5_tag | ATCCTCTGGTCCGCTCCAacgctcgact     |
| Hes5_tag | CCACATCCAGAGGAACGAGCTCacgctcgact |
| Hes5_tag | ACTGCGGCTGGGGAATGTCTTCacgctcgact |
| Hes5_tag | AGAAGGTAGCGGCCAACCTGacgctcgact   |
| Hes5_tag | AATGACCCTCCTGCTGGCCAacgctcgact   |
| Hes5_tag | CAACTCTGCACACACATTCTCTacgctcgact |
| Hes5_tag | GGCCCTGATTATCCCCAAATGAacgctcgact |
| Hes5_tag | GCAAACACAAAACAACCCACGacgctcgact  |
| Hes5_tag | GTGACCAGGAACTTCGCAGAcgctcgact    |
| Hes5_tag | AAATATCATAGAACCCCCGGTGacgctcgact |
| Hes5_tag | GTGAGCCAACCCCCGACTCTAacgctcgact  |
| Hes5_tag | CCCTGAAGAAAGTCCTCTACGGacgctcgact |
| Hes5_tag | GCAGTTCGCGCTTCACAAAAGacgctcgact  |
| Hes5_tag | AGCGCGCATCAGACAGCCAAGacgctcgact  |
| Hes5_tag | AGGATCATCGTGGAGACCCAcgctcgact    |
| Hes5_tag | CCACCCATACAAAGGAATCCTacgctcgact  |
| Hes5_tag | TACAAAATCGTGCCACATGCacgctcgact   |
| Hes5_tag | CCCACATGACCAAGAGTTCAAaacgctcgact |
| Hes5_tag | GCCTTCAGAACAGCCTGTGacgctcgact    |

---
